# Supplementary material for: Responsiveness and Minimal Clinically Important Difference of the Infants and Toddlers Dermatology Quality of Life Questionnaire
Source: PubMed Central journal article supplement — Dermatol Ther (Heidelb). 2023 Sep 20;13(11):2879–93. doi: 10.1007/s13555-023-01022-x (PMC10613170; doi:10.1007/s13555-023-01022-x), 2023-09-20
Supplement: 13555_2023_1022_MOESM1_ESM.pdf [file 13555_2023_1022_MOESM1_ESM.pdf]

## Supplementary Material

### **Responsiveness and Minimal Clinically Important Difference of the Infants and Toddlers Dermatology Quality of Life questionnaire**

Pavel V Chernyshov<sup>1</sup> <https://orcid.org/0000-0001-7275-4651>, Servando E Marron<sup>2</sup> <https://orcid.org/0000-0001-5632-0351>, Dimitra Koumaki<sup>3</sup> <https://orcid.org/0000-0001-7074-2374>, Nives Pustišek<sup>4</sup>, Liana Manolache<sup>5</sup> <https://orcid.org/0000-0003-2357-4229>, Carmen Salavastru<sup>6</sup> <https://orcid.org/0000-0002-3160-9826>, Alina Suru<sup>6</sup>, Adelina Sendrea<sup>6</sup>, Tetiana Svyatenko<sup>7</sup> <https://orcid.org/0000-0003-4303-2937>, Olha Statkevych<sup>7</sup>, Michael J Boffa<sup>8</sup>, Sara Borg Grech<sup>8</sup>, Sergii Zemskov<sup>9</sup> <https://orcid.org/0000-0002-5039-1324>, Volodymyr V Kuts<sup>10</sup> <https://orcid.org/0000-0002-4434-7298>, Pavlo Lishchynskyi<sup>11</sup> <http://orcid.org/0000-0003-3586-0468>, Andrii V Chernyshov<sup>12</sup> <https://orcid.org/0000-0002-9564-759X>, Lucia Tomas-Aragones<sup>13</sup> <https://orcid.org/0000-0001-5891-628X>

<sup>1</sup> Department of Dermatology and Venereology, National Medical University, Kiev, Ukraine

<sup>2</sup> Department of Dermatology, University Hospital Miguel Servet, Aragon Psychodermatology Research Group (GAI+PD), Zaragoza, Spain

<sup>3</sup> Department of Dermatology and Venereology, University Hospital of Heraklion, Heraklion, Crete, Greece

<sup>4</sup> Children's Hospital Zagreb, Zagreb, Croatia

<sup>5</sup> Dermatology, Dali Medical, Bucharest, Romania

<sup>6</sup> Department of Paediatric Dermatology, Colentina Clinical Hospital, "Carol Davila" University of Medicine and Pharmacy, Bucharest, Romania

<sup>7</sup> Department of Skin and Venereal Diseases, Dnipro State Medical University, Dnipro, Ukraine

<sup>8</sup> Department of Dermatology, Mater Dei Hospital, Msida, Malta

<sup>9</sup> Department of General Surgery, Bogomolets National Medical University, Kyiv, Ukraine

<sup>10</sup> Department of Information and Computer Technologies, State Organization "National Institute of Phthisiology and Pulmonology named after F.G. Yanovsky National Academy of Medical Sciences of Ukraine", Kyiv, Ukraine

<sup>11</sup> Ukrainian Scientific and Practical Center of Endocrine Surgery, Transplantation of Endocrine Organs and Tissues of the Ministry of Health of Ukraine, Kyiv, Ukraine

<sup>12</sup> Department of Cellular Radiobiology, State Institution "National Research Center for Radiation Medicine of National Academy of Medical Sciences of Ukraine", Kyiv, Ukraine

<sup>13</sup> Department of Psychology, University of Zaragoza, Zaragoza, Spain

**Corresponding Author:**

Pavel Chernyshov, Department of Dermatology and Venereology, National Medical University, Bulvar Shevchenko, 13, 01601 Kiev, Ukraine.

Tel./ Fax: +38 044 2348660

E-mail: [chernyshovpavel@ukr.net](mailto:chernyshovpavel@ukr.net)

## Ethical Approval

|         |                                                                                                                                                                                   |
|---------|-----------------------------------------------------------------------------------------------------------------------------------------------------------------------------------|
| Spain   | Local ethics approval was not required for this type of study. Informed consent from patients' parents or guardians to participate and for publication was obtained in all cases. |
| Greece  | Ethical Committee of the University Hospital of Heraklion. Document number 18813                                                                                                  |
| Malta   | Local ethics approval was not required for this type of study. Informed consent from patients' parents or guardians to participate and for publication was obtained in all cases. |
| Croatia | Local ethics approval was not required for this type of study. Informed consent from patients' parents or guardians to participate and for publication was obtained in all cases. |
| Romania | Colentina Clinical Hospital Research Ethics Committee<br>The number of the document is 19/2022                                                                                    |
| Ukraine | Commission on Bioethical Expertise and Ethics in Scientific Studies. National Medical University. Document number 124                                                             |
